1 Title: **Ghosts of a structured past: Impacts of ancestral patterns of isolation-by-distance on**  
2 **divergence-time estimation**

3

4 Running Title: Impacts of ancestral IBD on divergence-times

5

6 Zachary B. Hancock<sup>\*1,2</sup>, Heath Blackmon<sup>1,2</sup>

7

8 <sup>1</sup>Department of Biology at Texas A&M University

9 <sup>2</sup>Ecology & Evolutionary Biology Interdisciplinary Program at Texas A&M University

10 \*Corresponding author: [zhancock@bio.tamu.edu](mailto:zhancock@bio.tamu.edu)

11

12 Author contributions: HB conceptualized the study; ZBH performed the analyses; ZBH and HB  
13 wrote the manuscript.

14

15 Acknowledgements: Thanks to Ben Haller and Wesley Brashear for coding help.

16

17 Data accessibility statement: SLiM recipes, R and python code, and .XML files have been  
18 uploaded to <https://github.com/hancockzb/ancestralIBD>.

19 Title: **Ghosts of a structured past: Impacts of ancestral patterns of isolation-by-distance on**  
20 **divergence-time estimation**

21

22 **Abstract**

23 Isolation by distance is a widespread pattern in nature that describes the reduction of genetic  
24 correlation between subpopulations with increased geographic distance. In the population  
25 ancestral to modern sister species, this pattern may hypothetically inflate population divergence  
26 time estimation due to the potential for allele frequency differences in subpopulations at the ends  
27 of the ancestral population. In this study, we analyze the relationship between the time to the  
28 most recent common ancestor and the population divergence time when the ancestral population  
29 model is a linear stepping-stone. Using coalescent simulations, we compare the coalescent time  
30 to the population divergence time for various ratios of the divergence time over the product of  
31 the population size and the deme number. Next, we simulate whole genomes to obtain SNPs, and  
32 use the Bayesian coalescent program SNAPP to estimate divergence times. We find that as the  
33 rate of migration between neighboring demes decreases, the coalescent time becomes  
34 significantly greater than the population divergence time when sampled from end demes.  
35 Divergence-time overestimation in SNAPP becomes severe when the divergence-to-population  
36 size ratio  $< 10$  and migration is low. We conclude that studies estimating divergence times be  
37 cognizant of the potential ancestral population structure in an explicitly spatial context or risk  
38 dramatically overestimating the timing of population splits.

39

40 Keywords: Phylogenetics, divergence-time, isolation-by-distance

## 41 Introduction

42

43 A major goal in phylogenetic and phylogeographic studies is the estimation of species  
44 divergence times. The topic has a long and contentious history largely centered around questions  
45 of how to appropriately apply fossil calibrations (e.g., Heath et al. 2014; Brown and Smith 2018),  
46 rate heterogeneity (Pond and Muse 2005), rate of morphological evolution (Lynch 1990), and  
47 selecting an adequate clock model (Douzery et al. 2004; Lepage et al. 2007).

48 Beyond methodological concerns are those that emerge from the nature of the data itself.  
49 Most phylogenetic models assume that fixed differences between species are the result of genetic  
50 drift, and under the neutral theory of molecular evolution (Kimura 1968; King and Jukes 1969)  
51 the rate of evolution (or substitution rate) is equal to the per generation neutral mutation rate,  $\mu$   
52 (Kimura 1983). For well-calibrated molecular clocks (e.g., Knowlton and Weigt 1998; Weir and  
53 Schluter 2008; Herman et al. 2018), we can estimate the time of divergence (usually in years) as  
54  $\pi_{12} / 2\mu$ , where  $\pi_{12}$  is the pairwise sequence divergence between species 1 and 2. However, in  
55 general we are not interested in estimating the divergence time of specific genetic variants, but  
56 rather the time of population divergence ( $T_D$ ). For example, we might be interested in estimating  
57 the timing of a vicariant event that we suspect corresponds to a past geological upheaval.

58 There is a known discrepancy between the coalescent time of neutral genetic variants  
59 ( $T_{MRCA}$ ) and  $T_D$  (Nei and Li 1979). The degree of this discrepancy is determined by the ratio of  
60  $T_D / N_e$ , where  $N_e$  is the effective population size (Edwards and Beerli 2000; Rosenberg and  
61 Feldman 2002). First, lineages must be within the same population, which occurs  $T_D$  generations  
62 in the past; second, these lineages must then coalesce, which on average requires  $2N_e$

63 generations. Therefore, for a completely panmictic population:  $T_{\text{MRCA}} = T_D + 2N_e$ . The expected  
64 amount of pairwise sequence divergence is

$$65 \quad E(\pi_{12}) = 2\mu[T_D + 2N_e] \quad (1)$$

66 (Wakeley 2000). When the ratio of  $T_D / N_e$  is large, the bias in coalescent time in the ancestral  
67 population is minimal compared to  $T_D$  (Edwards and Beerli 2000). However, as  $T_D / N_e$  becomes  
68 small,  $2N_e$  plays a major role in the overall sequence divergence between species. Nordberg and  
69 Feldman (2002) evaluated the relationship between  $T_{\text{MRCA}}$  and  $T_D$  in a simple two population  
70 split model using coalescent simulations. They found that  $T_{\text{MRCA}}$  converged on  $T_D$  when the ratio  
71 of  $T_D / N_e \approx 5$ . Importantly, the  $N_e$  in these models is that of the ancestral population; therefore,  
72 the extent of overestimation is the result of demographic conditions present in the ancestor.

73 Demographic conditions that inflate  $N_e$ , such as ancestral population structure or a bottleneck  
74 following the split, is expected to have a major impact on divergence-time estimation (Gaggiotti  
75 and Excoffier 2000; Edwards and Beerli 2000; Wakeley 2000).

76 Wakeley (2000) demonstrated that in descendant species who share an ancestor whose  
77 population dynamics are characterized by an island model (Wright 1931) with free migration  
78 between demes, overestimation of divergence-times are on the order of  $2N_e D [1 + (1/2M)]$  where  
79  $M = 2N_e m D / (D - 1)$  and  $m$  is the migration rate. The expected amount of pairwise sequence  
80 divergence is therefore

$$81 \quad E(\pi_{12}) = 2\mu \left[ T_D + 2N_e D \left( 1 + \frac{1}{2M} \right) \right] \quad (2)$$

82 where  $D$  is the number of demes.

83 Population subdivision initially leads to shallow coalescent times where individuals  
84 within a shared deme rapidly find ancestors (the “scattering phase”). However, since ancestral  
85 lineages must be in the same deme to coalesce, the rate in the “collecting phase” is characterized

86 by the migration rate that shuffles ancestors around the range, reducing the probability that  
87 lineages coalesce (Wakeley 1998; 1999).

88 In the context of real populations, the island model of migration rarely applies (Meirmans  
89 2012). Instead, population structure is the product of the spatial distribution and dispersal  
90 potential of the organism in question. Often this structure is in the form of isolation-by-distance  
91 (IBD). IBD is a widespread pattern in natural systems, characterized by a reduction in the  
92 probability of identity by descent (Wright 1943) or genetic correlation (Malécot 1968) with  
93 geographic distance. Patterns of IBD are most pronounced in stepping-stone models (Kimura  
94 1953; Kimura and Weiss 1964) in which migration is restricted to neighboring demes. In this  
95 way, demes in close proximity share a greater proportion of migrants than they do with more  
96 distant demes. Distributions of coalescent times in stepping-stone models have been studied both  
97 in the context of one dimensional and two-dimensional models that are circular or toroidal  
98 (Maruyama 1970a; 1970b; Slatkin 1991), and in continuous models with joined ends (Maruyama  
99 1971) or with discrete edges (Wilkins and Wakeley 2002). Slatkin (1991), using a circular  
100 stepping-stone model, showed that the probability for two genes sampled  $i$  steps apart have an  
101 average coalescent time:

$$102 \quad T_{MRC A} = 2N_e D + \frac{(D-i)i}{2m} \quad (3)$$

103 Therefore, the amount of expected pairwise sequence divergence is:

$$104 \quad E(\pi_{12}) = 2\mu \left[ T_D + 2N_e D + \frac{(D-i)i}{2m} \right] \quad (4)$$

105 The circular stepping-stone model should overestimate  $T_D$  more dramatically as the  
106 number of demes becomes large and the distance between them increases. However, like the  
107 island model of free migration, circular ranges are likely rare in nature. Instead, natural  
108 populations are characterized by discrete range edges where end demes may only receive

109 migrants from one direction (e.g., Peterson and Denno 1998; Broquet et al. 2006; Aguillon et al.  
110 2017). Hey (1991) showed analytically in the case of a linear stepping-stone model that the  
111 distribution of coalescent times of two alleles from demes at the extremes of the range should  
112 coalesce much deeper than any two alleles chosen randomly from the population.

113       Ultimately, the degree to which  $T_{MRCA}$  impacts phylogenetic inference and divergence-  
114 time estimation is dependent on its impact on  $\pi_{12}$ . Given that lower migration rates lead to  
115 greater  $T_{MRCA}$  (Hey 1991), we expect that differentiation ( $\pi_{12}$ ) between end demes compared to  
116 central will become more pronounced at smaller  $m$ . If the difference between the  $T_{MRCA}$  of  
117 central demes and end demes is dramatic enough, we expect that divergence dating of species  
118 that arose from ancestral end demes may significantly overestimate  $T_D$ . ##examples

119       In this study, we estimate mean  $T_{MRCA}$  for two genes sampled in descendant species  
120 (either from the ends or the center of the ancestral range) in which the ancestral population is  
121 characterized by a stepping-stone model with discrete ends using a simulation approach. In  
122 particular, we are interested in what value of  $T_D / ND$  we expect  $T_{MRCA}$  to converge on  $T_D$ . Next,  
123 we examine the distribution of  $\pi_{12}$  across the genome under different simulated migration  
124 conditions to compare with expectations under a panmictic model. Finally, we test the  
125 performance of the phylogenetic inference program SNAPP (Bryant et al. 2012) on simulated  
126 single nucleotide polymorphism (SNP) data to evaluate how these trends may bias our inference  
127 of species divergence times.

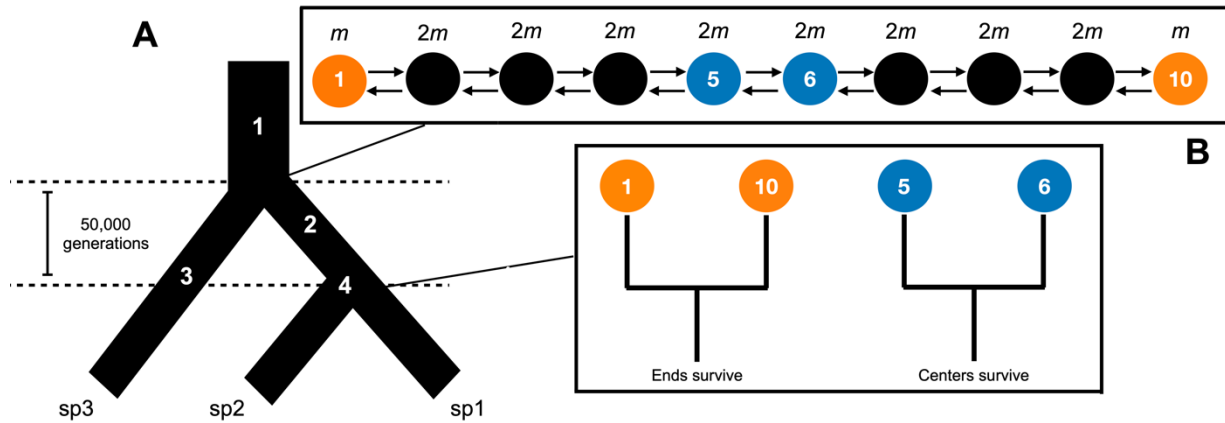

128

129 **Figure 1.** Population model for simulations. **A)** Three-taxon species tree: 1) coalescent simulations in *msprime* with  
 130  $N = 2000$ ; 2) ancestral stepping-stone conditions begin (see **B**); 3)  $N = 1000$ , panmictic; 4) population split, leaving  
 131 end or center demes surviving as sp1 and sp2. **B)** Ancestral population dynamics. Orange circles are “end demes”  
 132 and blue circles are sampled “center” demes.

133

## 134 Methods

135

### 136 *Coalescent simulations*

137 Using *fastsimcoal2* (Excoffier et al. 2013), we simulated sister species with a shared ancestor  
 138 whose population dynamics are characterized by a stepping-stone model. Specifically, each  
 139 simulation consisted of 10 demes ( $D$ ) with no shared migration between them until time  $T_D$ . At  
 140  $T_D$ , migration resumes between demes in a linear stepping-stone fashion. In *fastsimcoal2*, the  
 141 migration rate is the probability of an individual from deme  $i$  migrating to deme  $j$ , where  $i$  and  $j$   
 142 are neighboring demes. Center demes receive migrants from neighboring demes at rate  $2m$ ,  
 143 whereas demes at the end of the range receive migrants at rate  $m$ . This is due to the fact that end  
 144 demes have only a single neighbor, whereas all center demes have two neighbors (Fig. 1A).

145 Throughout, we will use “end demes” to represent species descending from the ends of the  
146 ancestral range; “center demes” are those that descend from the center. We sampled  $k = 2$   
147 individuals to coalesce—in one run, we sample the end demes, and in the following we sample  
148 central neighboring demes. This was performed for migration rates of 0.1, 0.01, and 0.001, and a  
149 range of  $T_D / ND$  values. In addition, we simulated an island model of migration for comparison  
150 with the stepping-stone model. In the island model, the ancestral population consisted of 10  
151 demes with free migration between each at rate  $m$ . This resulted in a total of 84 distinct  
152 simulation scenarios, and each were replicated 1,000 times.

153 To statistically compare between the three models (end deme sampled in stepping-stone,  
154 center deme in stepping-stone, and the island model), we subset ratios of  $T_D / ND$  to values of  
155 10, 5, 2, 1, 0.5, and 0.1. Resulting  $T_{MRCA}$  distributions for each population model were compared  
156 using a pairwise Wilcoxon test in the R platform (R Core Team 2019), as the resulting  
157 distributions were non-normal.

158

### 159 *Genome simulations*

160 To evaluate how ancestral IBD impacts pairwise sequence divergence ( $\pi_{12}$ ), genome-wide  
161 coalescent times ( $T_{MRCA}$ ), and divergence-time estimation, we performed hybrid simulations that  
162 combined the coalescent simulator *msprime* (Kelleher et al. 2016) and the forward-time  
163 simulator SLiM v3.3 (Haller and Messer 2019). Since forward-time simulators begin with  
164 individuals that are completely unrelated, often a neutral burn-in period is required to allow  
165 coalescence or mutation-drift equilibrium to occur (Haller et al. 2019). This can be  
166 computationally costly and time consuming; however, using tree-sequence recording methods in  
167 SLiM (Haller et al. 2019) we can bypass the need to equilibrate during the forward-time



168 simulation. To generate a panmictic ancestral population with a coalescent history, we simulated  
169 2000 individuals ( $N_e = 4000$ ) using *msprime* with genome sizes of 10 Mb and a recombination  
170 rate of  $10^{-8}$  ( $\sim 0.1$  recombination events per individual per generation). The resulting coalescent  
171 trees were then imported into SLiM as the basis for the starting population.

172 In SLiM, the initial population was split into two populations of  $N = 1000$ : 1) an outgroup  
173 that remained panmictic (“sp3” in Fig. 1A) and 2) the ancestral population, which was  
174 subdivided into 10 demes ( $N = 100$  per deme) in a linear stepping-stone model. These dynamics  
175 persisted for 50,000 generations after which the ancestral population was split into either “end”  
176 demes or “center” demes (see Fig. 1A). Population sizes of each deme following the split was  
177 increased to 1000 to maintain  $N$  throughout the simulation. Five different  $T_D$  values were  
178 simulated which correspond to  $T_D / ND$  ratios of 50, 25, 10, 5, and 1. These values of  $T_D / ND$   
179 were chosen based on the results from the coalescent simulations (see Results); for values  $>10$ ,  
180  $T_{MRCA}$  is expected to converge on  $T_D$ , whereas values  $<10$  are expected to overestimate  $T_D$   
181 regardless of migration rates.

182 The resulting tree-sequences from the SLiM simulation were imported into Python 3  
183 using *pyslim*, and we overlaid neutral mutations ( $\mu = 10^{-7}$ ) onto the trees using *msprime*. Pairwise  
184 divergence ( $\pi_{12}$ ) was then estimated across the genome in windows of 100 kb for both end demes  
185 and center demes. These values were also converted into generations using  $\pi_{12} / 2\mu$ , which gives  
186 a rough estimate of divergence time per window.

187 By rearranging equation 1, we can naively calculate  $N_e$  for the ancestral population from  
188 genome-wide  $\pi_{12}$  as:

189 
$$N_e = \frac{\pi_{12} - 2T_D\mu}{4\mu} \quad (5)$$

190 From this, we plot estimated ancestral  $N_e$  within 100 kb windows across the genome to compare  
191 with the known census population size ( $N_c = 1000$ ), and to evaluate the relationship between  $N_c$   
192 and  $N_e$  in the presence of IBD.

193 Next, we plotted the distribution of coalescent times ( $T_{MRCA}$ ) across the genome to  
194 visualize differences between  $T_{MRCA}$  of end and center demes. Median  $T_{MRCA}$  for each ratio and  
195 migration rate was compared via a Kruskal-Wallis test and a pairwise Wilcoxon rank test in R  
196 due to the data violating normality.

197 Each simulation produced >200,000 SNPs. For divergence-time analysis, we randomly  
198 sampled 3000 SNPs—a number found by Strange et al. (2018) to optimally perform in SNAPP  
199 (Bryant et al. 2012). Each run consisted of 10 individuals from species sp1 and sp2, and 1  
200 individual from the outgroup population, sp3 (Fig. 1). Unlike other fully coalescent models,  
201 SNAPP does not sample from gene trees directly to estimate the species tree, but instead  
202 integrates over all possible gene trees using biallelic SNPs. The method has been found  
203 previously to perform well on both simulated and empirical data (Bryant et al. 2012; Strange et  
204 al. 2018). We designated a gamma-distributed prior on  $\theta (=4N_e\mu)$  with a mean equal to the  
205 expected  $\pi_{12}$  (equation 1). Forward ( $u$ ) and backward ( $v$ ) mutation rates were estimated within  
206 BEAUti (Bouckaert et al. 2014) from the empirical SNP matrix using the tab  
207 *Calc\_mutation\_rates*, and these values were sampled during the MCMC. The rate parameter  $\lambda$ ,  
208 which is the birth-rate on the Yule tree prior, was gamma-distributed with  $\alpha = 2$  and  $\beta = 200$ ,  
209 where the mean is  $\alpha / \beta$  (Leaché and Bouckaert 2018).

210 SNAPP is designed to handle incomplete lineage sorting (ILS), but to minimize its  
211 effects—since we are not interested in the program’s ability to estimate topology but rather  
212 branch-lengths—we applied a fixed species tree. Branch-lengths in SNAPP do not scale to time,

213 but instead are measured in number of substitutions. Given a fixed mutation rate, we convert the  
214 number of substitutions separating sp1 and sp2 to the number of generations as  $g = s / \mu$ , where  $s$   
215 is branch-lengths in units of substitutions (Bouckaert and Bryant 2015). The MCMC chain length  
216 was 10–50 million sampling every 1000 with a burn-in of 10%, ensuring that ESS values of  
217 interest were all  $>200$ . Runs were performed on the high-performance computing cluster  
218 CIPRES ([www.phylo.org](http://www.phylo.org); Miller et al. 2010).

219 MCMC log files were then downloaded and analyzed in R. The performance of SNAPP  
220 was evaluated by comparing traces of end and center demes across migration rates and  $T_D / ND$   
221 values. Results were evaluated using a two-way ANOVA followed by Tukey's HSD post hoc  
222 test in R. Trees from the MCMC were summarized in TreeAnnotator v.2.6.0 (Bouckaert et al.  
223 2014) and visualized in R using the package *ggtree* (Yu et al. 2017). Branch colors and widths  
224 were scaled by estimated median  $\theta$  per branch.

225

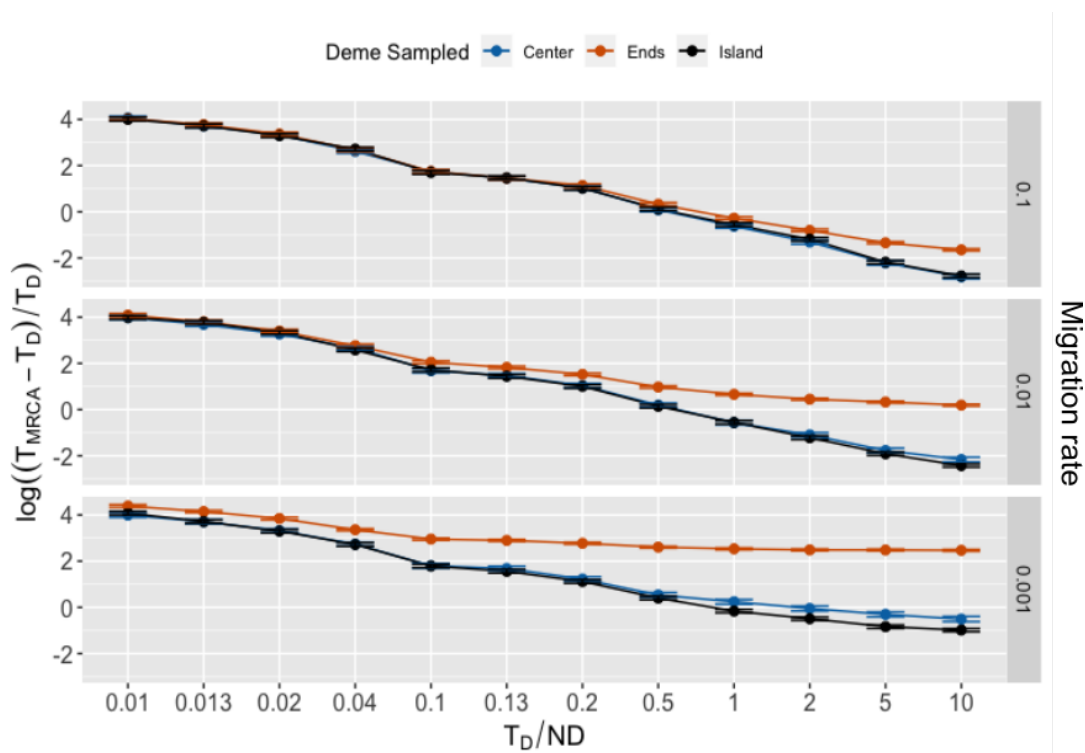

226 **Figure 2.** Plots of  $\log((T_{MRCA} - T_D) / T_D)$  against  $T_D / ND$  for each migration rate (0.1, 0.01, 0.001). Each point is  
227 the mean of 1000 simulations. Y-axis has been log-transformed to aid in visualizing differences between  
228 model/deme sampled.

229

## 230 Results

231

### 232 *Coalescent simulation results*

233 The coalescent simulations produced trends superficially similar to those found by Rosenberg  
234 and Feldman (2002). At the lowest  $T_D / ND$ , the proportion of deep coalescence was dramatically  
235 greater than at higher values with the curve producing a similar logarithmic relationship (Fig. 2).  
236 However,  $T_D$  and  $T_{MRCA}$  did not necessarily converge when  $T_D / ND = 5$ . Instead, the rate of  
237 convergence was dependent on both the deme sampled and the migration rate.

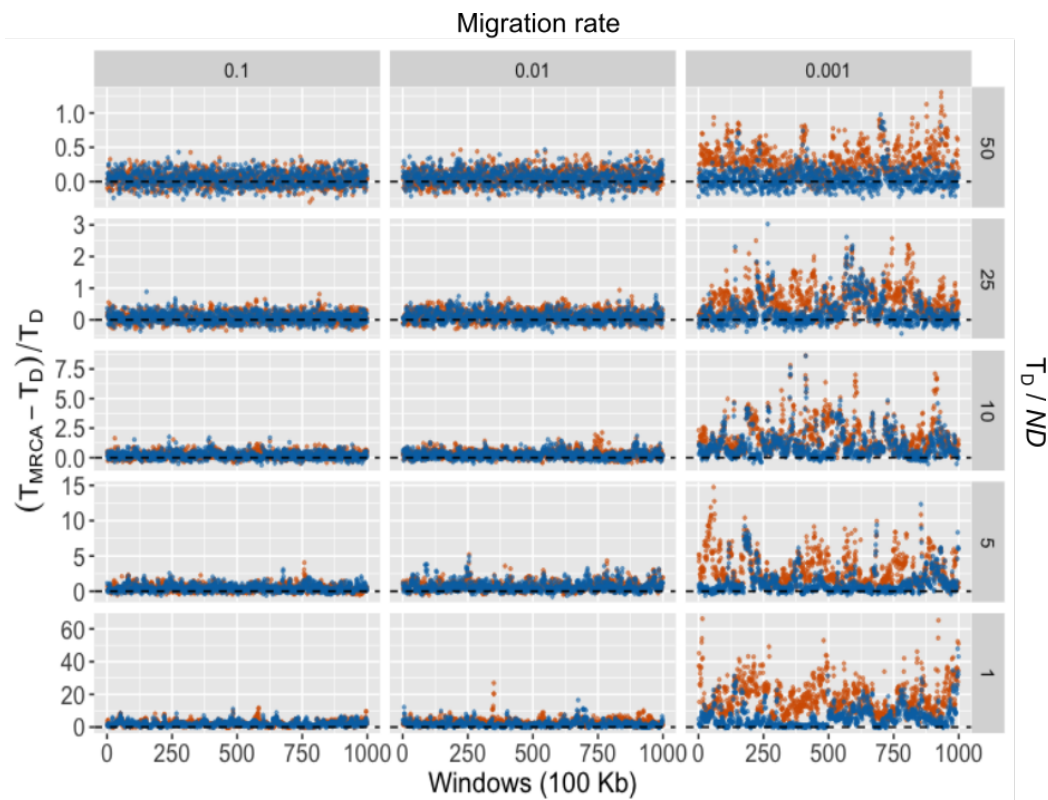

238 **Figure 3.** Genome-wide divergence times based on  $\pi_{12}$ . Divergence times are estimated as  $\pi_{12} / 2\mu$  and evaluated in  
239 100 Kb windows. The y-axis is the scaled proportion of overestimation, where  $T_{MRCA}$  is the estimated age and  $T_D$  is  
240 the true age. The dashed line represents the value at which these two converge (i.e., 0). Center (blue), ends (orange).

241 Note the y-axis differs between the panels.

242

243 When migration was high ( $m = 0.1$ ) and  $T_D / ND$  was less than 0.5, there was no  
244 significant difference between center or end demes in the stepping-stone model or the island  
245 model. However, for values of  $T_D / ND > 0.5$ , the  $T_{MRCA}$  of end demes became significantly  
246 different from both island ( $p < 0.02$ ) and center demes ( $p < 0.01$ ; see Table S1). When migration  
247 was reduced below 0.1, this pattern became more extreme. End demes were significantly  
248 different in all pairwise comparisons of models ( $p < 0.000001$ ), and center demes differed from  
249 the island model at  $T_D / ND$  ratios of 0.5, 2, and 10 ( $p < 0.03$ ) when  $m = 0.01$ . At the lowest  
250 migration rate simulated ( $m = 0.001$ ), all pairwise model comparisons were significantly  
251 different when  $T_D / ND > 0.5$  ( $p < 0.001$ ; see Table S1).

252

### 253 *Genome simulation results*

254

255 Results from the genome simulation approach corroborated those found with  
256 *fastsimcoal2*. Regardless of  $T_D / ND$ , when  $m = 0.1$  the difference between center and end demes  
257 was less severe and only marginally significant ( $p = 0.001$ ) relative to when  $m < 0.1$  (Table S2).  
258 Across the simulated genomes,  $T_{MRCA}$  became dramatically deeper between end than center  
259 demes as migration fell below 0.01. For the genome-wide divergence estimates, the degree of  
260 overestimation depended on the ratio of  $T_D / ND$ . While all scenarios where  $m = 0.001$   
261 overestimated the true  $T_D$ , when  $T_D / ND < 10$  end demes were 5–60 times more diverged than

262 expected (Fig. 3). This is a direct result of the deeper coalescent times between end demes when  
 263  $m < 0.1$ , as these longer branches provide more time for mutations to occur and accumulate (Fig.  
 264 4).

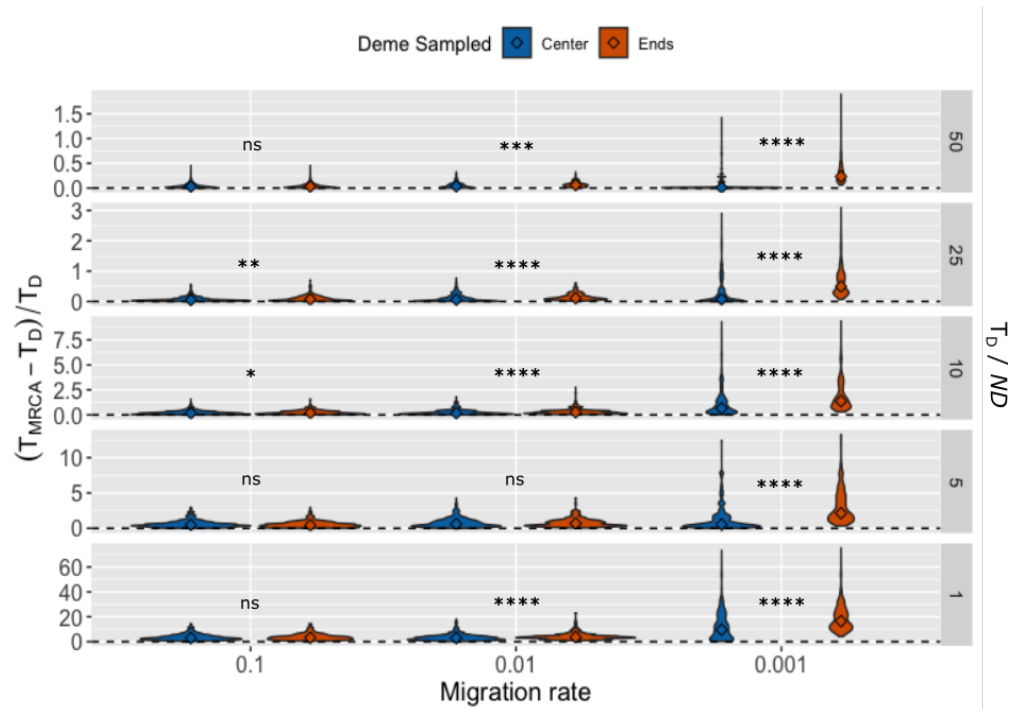

265  
 266 **Figure 4.** Violin plot of coalescent times ( $T_{MRCA}$ ) across the genome, where times have been converted into  
 267 proportions of the population divergence time ( $T_D$ ). Diamonds are medians; ns = “not significant”,  $p < 0.05$  (\*),  $p <$   
 268  $0.001$  (\*\*),  $p < 0.0001$  (\*\*\*),  $p < 0.00001$  (\*\*\*\*). See Table S2 for specific  $p$ -values. Note that the y-axis differs  
 269 between panels.

271 Genome-wide coalescent times ( $T_{MRCA}$ ) are shown in Fig. 4. When  $m = 0.1$ , only  $T_D / ND$   
 272  $= 25$  and  $10$  were significantly different between end and center demes ( $p < 0.005$ ). Regardless  
 273 of  $T_D / ND$ , the variance in  $T_{MRCA}$  steadily increased with decreasing  $m$ . Indeed, the increase in  
 274 mean  $T_{MRCA}$  when  $m = 0.001$  appears largely driven by an increase in the variance at this lower  
 275 rate. Due to this, we find that ancestral  $N_e$  dramatically exceeds  $N_e$  when  $m = 0.001$  (Fig. 6).

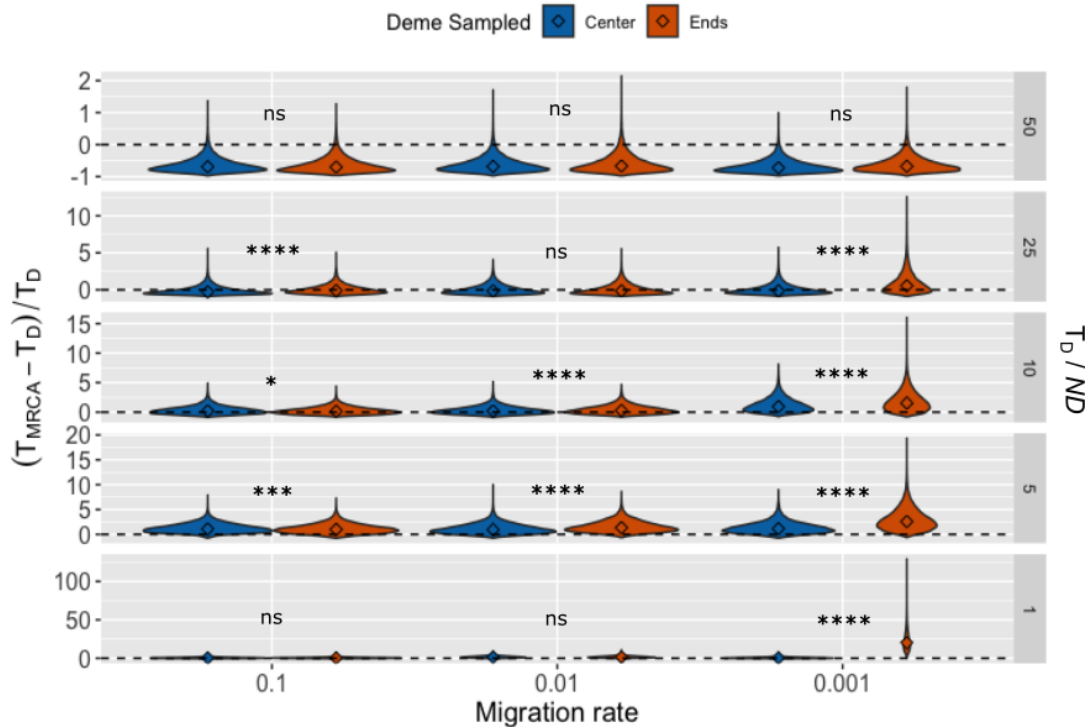

276 **Figure 5.** Violin plots of the estimated  $T_{MRCA}$  by SNAPP. Diamonds are medians; ns = “not significant”,  $p < 0.05$   
 277 (\*),  $p < 0.001$  (\*\*),  $p < 0.0001$  (\*\*\*),  $p < 0.00001$  (\*\*\*\*\*). Dashed lines represent when the estimated age converges  
 278 on the true age (i.e., at 0). Note that the y-axis is different between the panels.

279

280 Despite the potential for divergence-time overestimation to be extreme, SNAPP was  
 281 relatively resilient when  $T_D / ND > 10$  and when  $m > 0.001$ . When  $T_D / ND = 50$ , SNAPP was  
 282 overly conservative and underestimated the number of substitutions expected to occur (Fig. 5).  
 283 When  $T_D / ND = 25$ , the mean estimate of both center and end demes when  $m > 0.001$  either  
 284 underestimated the true age or was within 5%. However, for end demes where  $m = 0.001$  the  
 285 estimated divergence time exceeded the true age by ~80% (Table S3). A similar trend occurred  
 286 when  $T_D / ND = 10$  and 5. Here, both center and ends overestimated the true age, but the end  
 287 demes did so more dramatically (138% the true age versus 81% for 10; 184% versus 67% for 5).  
 288 The most dramatic overestimation occurred between end demes when  $T_D / ND = 1$  at ~700% the  
 289 true age. Importantly, this was not merely the result of a low  $T_D / ND$  ratio, as the other

290 migration regimes performed well. In fact, most were closer to the true  $T_D$  than the expected  $\pi_{12}$   
291 accounting for  $2N$  (Table S3).

292 Estimated  $\theta$  for each branch is shown in Fig. 7 for  $T_D / ND = 10$ , and in Figs. S1–S4 for  
293 the remaining ratios. For all  $T_D / ND$  values except 1, the median ancestral  $\theta$  was higher for end  
294 demes than center when  $m = 0.001$ , and the estimated  $\theta$  for the descendant species (sp1 and sp2  
295 in Fig. 1) was considerably lower than for the ancestor or the outgroup, sp3 (Fig. 7; Figs. S1–S3).  
296 These patterns are consistent with a population bottleneck, despite  $N$  being maintained  
297 throughout the simulation.

298

## 299 Discussion

300

301 Macroevolutionary patterns are ultimately governed by microevolutionary processes (Li et al.  
302 2018), an observation Lynch (2007), extending Dobzhansky's (1973) maxim, summed up as  
303 “nothing in evolution makes sense except in light of population genetics”. In this light, we have  
304 demonstrated that the population genetic environment of the ancestor shapes the genetic  
305 landscape of descendant species. This has been known to impact tree topology when ILS is  
306 common (Kubatko and Degnan 2007) and overestimate divergence times in the presence of  
307 population structure caused by an island model of migration (Edwards and Beerli 2000; Wakeley  
308 2000). Extensive prior work has shown that the stepping-stone model of migration reduces  
309 genetic correlation between demes (Kimura and Weiss 1964; Maruyama 1970a) and that demes  
310 farther apart should coalesce deeper in time than those geographically closer (Slatkin 1991; Hey  
311 1991). However, to our knowledge, the impact of ancestral IBD has not been evaluated in the  
312 context of divergence-time estimation previously.



313 Rosenberg & Feldman (2002) found previously that when  $T_D / N = 5$ ,  $T_{MRCA}$  and  $T_D$   
314 largely converged in a simple population split model. However, when in the presence of  
315 ancestral IBD we found that convergence was dependent on the migration rate (i.e., the strength  
316 of ancestral IBD) and whether surviving demes neighbored each other or were at the range ends  
317 in the ancestral population.

318 When  $T_D / ND > 10$ , the ancestral dynamics contribute little to the divergence-time  
319 estimate differences between center and end demes. However, as this ratio decreases the  
320 contribution of  $2N_e$  to overall sequence divergence becomes non-trivial. The probability that  
321 genetic variants share an ancestor just prior to the population split is higher between demes that  
322 are geographically closer than those more distant. This is mediated by the migration rate, which,  
323 when high enough, can largely erase the differences between center and end demes. When  
324 migration is high (10%, or  $m = 0.1$ ), individuals move well between demes and the coalescent  
325 times largely converge (though deeper in time depending on the ratio of  $T_D / ND$ ). However, as  
326  $m$  falls below 1% ( $m = 0.01$ ), or less than one migrant per generation being shared between  
327 demes, dispersal cannot keep up with genetic differentiation. Despite all migration regimes  
328 producing similar patterns of IBD (Fig. S5),  $F_{ST}$  becomes dramatically higher as migration drops  
329 below 1%. This differentiation in the ancestor contributes to the overall sequence divergence  
330 ( $\pi_{12}$ ) between species, which drives an overestimation of the time of the population split ( $T_D$ )  
331 when end demes are the surviving lineages.

332 As expected, ancestral IBD skews  $\pi_{12}$  and  $T_{MRCA}$  away from expected values in a  
333 panmictic population, and this caused an inflation in  $N_e$  relative to  $N_c$ . For  $T_D / ND = 50$  and  $m =$   
334 0.1, the mean  $\pi_{12}$  for end demes was 0.010459 and 0.010419 for center demes. Using equation 5,  
335  $N_e = 1147.5$  for end demes and 1047.5 for central. However, when  $m = 0.001$ ,  $\pi_{12}$  for end demes

336 was 0.012948, an  $N_e = 7370$ . Center demes, on the other hand, only increased to  $N_e = 1255$ . As  
 337 with the coalescent times, at lower migration rates the variance in  $N_e$  becomes exceedingly large,  
 338 driving up the mean. Importantly, mean genome-wide  $N_e$  always exceeds  $N_c$  in the presence of  
 339 ancestral IBD at a level dictated by the migration rate.

340 This feature of ancestral IBD has important consequences for conservation genetics.  
 341 Many studies use  $N_e$  as a rough biological measure of population size (Turner et al. 2002;  
 342 Rieman and Allendorf, 2011; Hare et al. 2011), and therefore a metric of the health of a  
 343 population. However, a common phenomenon in range contractions is fragmentation and  
 344 isolation (Ceballos et al. 2017), which may result in IBD. If many of the demes once contributing  
 345 to the connectivity of the population have become extinct, and  $N_e$  is estimated based on the  
 346 surviving demes, it will overestimate the actual number of individuals within the population (i.e.,  
 347 the census size,  $N_c$ ). Thus, we might incorrectly conclude that a population has a larger  
 348 population size than it actually does, which may lead to mismanagement.

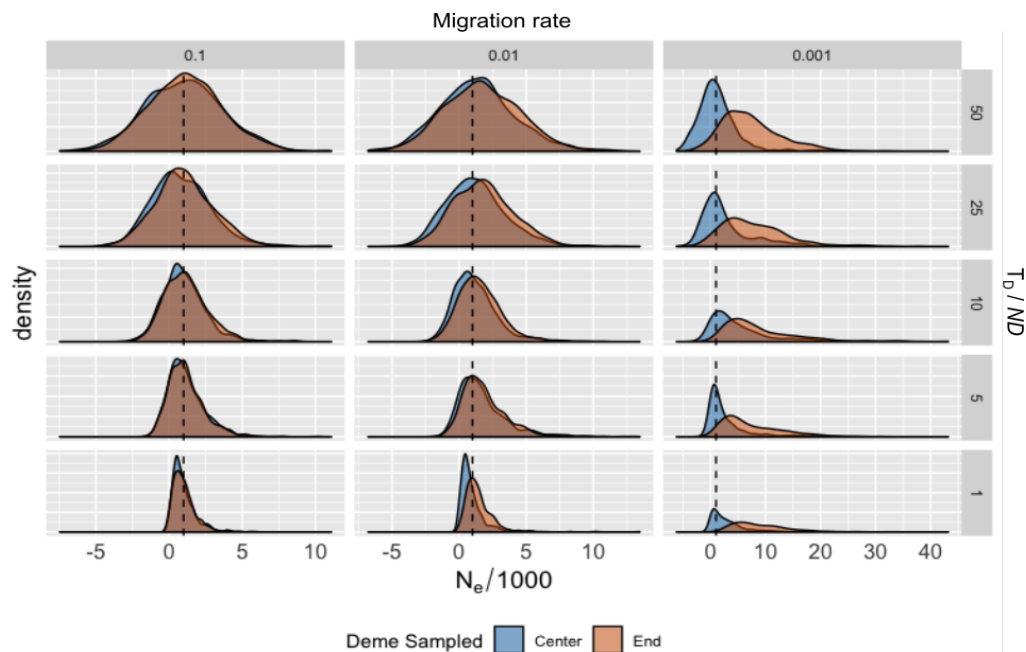

349 **Figure 6.** Density plot of scaled  $N_e$  (/1000) based on mean  $\pi_{12}$  across genomic windows of 100kb. Dashed line is  
 350 when  $N_e / N_c = 1$ .

351

352           Since  $N_e$  is inflated in the ancestral lineage, the descendant species appear to pass through  
353 a bottleneck despite  $N$  remaining constant (Fig. 7). Estimated  $\theta$  in SNAPP captured this dynamic  
354 with more extreme differences in  $\theta$  (i.e., more dramatic bottlenecks) being inferred between end  
355 demes and when  $m = 0.001$ . Population bottlenecks have been found to cause divergence-time  
356 overestimation due to random differential survival of ancestral alleles into the descendant species  
357 (Gaggiotti and Excoffier 2000). In the presence of IBD, this differential allelic persistence  
358 between demes is mimicking a bottleneck—when demes are far apart this pattern is more  
359 extreme as they already maintain different allelic patterns ancestrally. However, because this  
360 pattern is recognizable (Fig. 7; Figs. S1–S3) it can be used to signal when ancestral IBD may be  
361 impacting our divergence-time estimation. Unfortunately, without prior range-size knowledge it  
362 may be impossible to differentiate between ancestral IBD and a bottleneck since these produce  
363 virtually identical genetic patterns. However, it may not be necessary to do so for simple  
364 divergence estimates.

365           The broader impact of ancestral IBD on divergence-time estimation when in the context  
366 of large phylogenies is beyond the scope of this work, but it is conceivable that the longer than  
367 expected branches between sister species might bias rate estimation (Aris-Brosou and Excoffier  
368 1996; Magallón 2010). In the case of ancestral IBD, the inflated  $N_e$  is mimicking a pattern of  
369 substitution rate increase. Under neutrality, the rate of substitution is equal to the per generation  
370 mutation rate,  $\mu$  (Kimura 1983); however, in the presence of population structure, substitutions  
371 may occur in the ancestral lineages between demes separated by large geographic distances. If

372 the true age of the sister taxa is known but ancestral structure is not accounted for, the  
373 substitution rate will be upwardly biased.

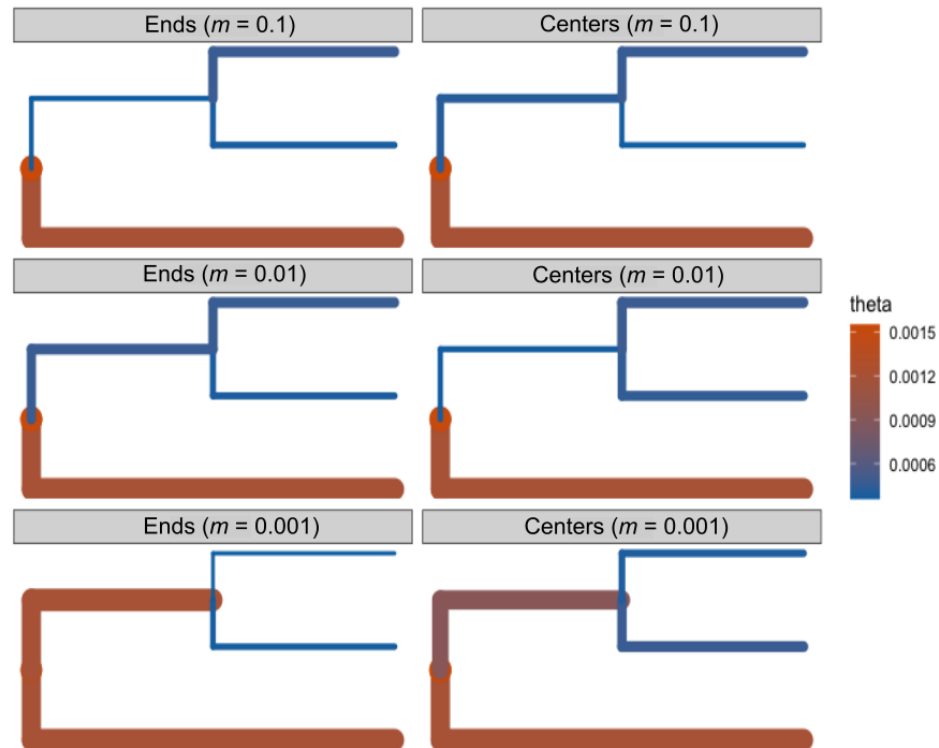

374  
375 **Figure 7.** Estimates of  $\theta$  in SNAPP for  $T_D / ND = 10$ . Branch widths are proportional to the estimated  $\theta$ .

376  
377 Ancestral structured populations leave their imprint on descendent species in the form of  
378 greater coalescent times, and therefore larger than expected pairwise divergences between  
379 species. Further, these patterns cause inflated  $N_e$  relative to census sizes. Since ancestral IBD  
380 mimics the signature of a population bottleneck, coalescent methods that co-estimate  $\theta$  along  
381 with the topology and  $\pi_{12}$ , such as SNAPP and \*BEAST (Bouckaert et al., 2014), may be the  
382 best suited to reveal this potential source of bias. However, fully coalescent models such as these  
383 are infamously computationally costly and not presently used for whole-genome sequence data

384 or for phylogenies with large numbers of tips. Indeed, SNAPP becomes prohibitively slow when  
385 the number of tips is ~30 (Leaché and Bouckaert, 2018).

386 In the context of larger phylogenies or organisms in which little is known about their  
387 ancestral range, it may be impossible to know if extant species descend from range centers or  
388 ends, or the level of IBD present in the ancestor. The genetic consequences of ancestral structure  
389 therefore behave much like “ghost” populations (Slatkin 2005); despite being extinct, their  
390 influence haunts our ability to adequately assess the phylogenetic history of their descendants.

391

## 392 **References**

393

394 Aguillon, S.M., Fitzpatrick, J.W., Bowman, R., Schoech, S.J., Clark, A.G., Coop, G., and N.  
395 Chen. 2017. Deconstructing isolation-by-distance: The genomic consequences of limited  
396 dispersal. *PLoS Genet.* 13(8): e1006911.

397

398 Aris-Brosou, S., and L. Excoffier. 1996. The impact of population expansion and mutation rate  
399 heterogeneity on DNA sequence polymorphism. *Mol. Biol. Evo.* 13(3): 494–504.

400

401 Bouckaert, R., and Bryant, D. 2015. A rough guide to SNAPP. <https://www.beast2.org/snapp/>

402

403 Bouckaert, R., Heled, J., Kühnert, D., Vaughan, T., Wu, C-H., Xie, D., Suchard, M.A., Rambaut,  
404 A., and Drummond, A.J. (2014). BEAST 2: A Software Platform for Bayesian Evolutionary  
405 Analysis. *PLoS Comp. Bio.* 10(4): e1003537.

406

407 Broquet, T., Ray, N., Petit, E., Fryxell, J.M., and F. Burel. 2006. Genetic isolation by distance  
408 and landscape connectivity in the American marten (*Martes americana*). *Land. Eco.* 21: 877–  
409 889.

410

411 Brown, J.W., and S.A. Smith. 2018. The past sure is tense: On interpreting phylogenetic  
412 divergence time estimates. *Syst. Biol.* 67(2): 340–353.

413

414 Bryant, D., Bouckaert, R., Felsenstein, J., Rosenberg, N.A. and A. RoyChoudhury. 2012.  
415 Inferring species trees directly from biallelic genetic markers: bypassing gene trees in a full  
416 coalescent analysis. *Mol. Bio. Evo.* 29(8): 1917–1932.

417

- 418 Ceballos, G., Ehrlich, P.R., and R. Dirzo. 2017. Biological annihilation via the ongoing sixth  
419 mass extinction signaled by vertebrate population losses and declines. PNAS. 114(30): E6089-  
420 E6096.
- 421
- 422 Dobzhansky, T. 1973. Nothing in biology makes sense except in the light of evolution. American  
423 Biology Teacher. 35: 125–129
- 424
- 425 Douzery, E.J.P., Snell, E.A., Bapteste, E., Delsuc, F., and H. Philippe. 2004. The timing of  
426 eukaryotic evolution: Does a relaxed molecular clock reconcile proteins and fossils? PNAS.  
427 101(43): 15386–15391.
- 428
- 429 Edwards, S.V., and P. Beerli. 2000. Gene divergence, population divergence, and the variance in  
430 coalescent time in phylogeographic studies. Evolution. 54(6): 1839–1854.
- 431
- 432 Excoffier, L., Dupanloup, I., Huerta-Sánchez, E., Sousa, V.C., and M. Foll. 2013. Robust  
433 demographic inference from genomic and SNP data. PLoS Genet. 9(10): e1003905.
- 434
- 435 Gaggiotti, O.E., and L. Excoffier. 2000. A simple method for removing the effect of a bottleneck  
436 and unequal population sizes on pairwise genetic distances. Proc. B. 267(1438): 81–87.
- 437
- 438 Haller, B.C., and P.W. Messer. 2019. SLiM 3: Forward genetic simulations beyond the Wright-  
439 Fisher Model. Mol. Bio. Evo. 36(3): 632–637.
- 440
- 441 Haller, B.C., Galloway, J., Kelleher, J., Messer, P.W., and P.L. Ralph. 2019. Tree-sequence  
442 recording in SLiM opens new horizons for forward-time simulation of whole genomes. Mol.  
443 Eco. Res. 19(2): 552–566.
- 444
- 445 Hare, M.P., Nunney, L., Schwartz, M.K., Ruzzante, D.E., Burford, M., Waples, R.S., Ruegg, K.,  
446 and F. Palstra. Understanding and Estimating Effective Population Size for Practical Application  
447 in Marine Species Management. 25(3): 438–449.
- 448
- 449 Heath, T.A., Hueslenbeck, J.P., and T. Stadler. 2014. The fossilized birth-death process for  
450 coherent calibration of divergence-time estimates. PNAS. E2957-E2966.
- 451
- 452 Herman, A., Brandvain, Y., Weagley, J., Jeffery, W.R., Keene, A.C., Kono, T.J.Y., Bilandžija,  
453 H., Borowsky, R., Espinasa, L., O'Quin, K., Ornelas-García, C.P., Yoshizawa, M., Carlson, B.,  
454 Maldonado, E., Gross, J.B., Cartwright, R.A., Rohner, N., Warren, W.C., and S.E. McGaugh.  
455 2018. The role of gene flow in rapid and repeated evolution of cave-related traits in Mexican  
456 tetra, *Astyanax mexicanus*. Mol. Eco. 27(22): 4397–4416.
- 457
- 458 Hey, J. 1991. A multi-dimensional coalescent process applied to multi-allelic selection models  
459 and migration models. Theo. Pop. Bio. 39: 30–48.
- 460
- 461 Kelleher, J., Etheridge, A.M., and G. McVean. 2016. Efficient Coalescent Simulation and  
462 Genealogical Analysis for Large Sample Sizes. PLoS Comput. Biol. 12(5): e1004842.
- 463

- 464 Kimura, M. 1953. “Stepping Stone” model of population. *Ann. Rept. Nat. Inst. Genetics,*  
465 *Japan.* 3: 62–63.  
466
- 467 Kimura, M. 1968. Evolutionary rate at the molecular level. *Nature.* 217: 624–626.  
468
- 469 Kimura, M. 1983. *The Neutral Theory of Molecular Evolution.* Cambridge Univ. Pres.,  
470 Cambridge, UK.  
471
- 472 Kimura, M. and G. Weiss. 1964. The stepping stone model of population structure and the  
473 decrease of genetic correlation with distance. *Genetics.* 49: 561–576.  
474
- 475 King, J.L., and T.H. Jukes. 1969. Non-Darwinian evolution. *Science.* 164: 788–798.  
476
- 477 Knowlton, N. and L.A. Weigt. 1998. New dates and new rates for divergence across the Isthmus  
478 of Panama. *Proc. B.* 265(1412): 2257–2263.  
479
- 480 Kubatko, L.S., and J.H. Degnan. 2007. Inconsistency of Phylogenetic Estimates from  
481 Concatenated Data under Coalescence. *Sys. Bio.* 56(1): 17–24.  
482
- 483 Leaché, A., and Bouckaert, R. 2018. Species Trees Estimation with SNAPP: A Tutorial and  
484 Example. *Workshop on Population and Speciation Genomics, Český Krumlov.*  
485
- 486 Lepage, T., Bryant, D., Philippe, H., and N. Lartillot. 2007. A general comparison of relaxed  
487 molecular clock models. *Mol. Biol. Evo.* 24(12): 2669–2680.  
488
- 489 Li, J., Huang, J-P., Sukumaran, J., and L.L. Knowles. 2018. Microevolutionary processes impact  
490 macroevolutionary patterns. *BMC Evo. Bio.* 18: 123.  
491
- 492 Lynch, M. 1990. The rate of morphological evolution in mammals from the standpoint of the  
493 neutral expectation. *Am. Nat.* 136(6): 727–741.  
494
- 495 Lynch, M. 2007. *The Origins of Genome Architecture.* Sinauer Associates, Inc. Sunderland, MA.  
496
- 497 Magallón, S. 2010. Using Fossils to Break Long Branches in Molecular Dating: A Comparison  
498 of Relaxed Clocks Applied to the Origin of Angiosperms. *Sys. Bio.* 59(4): 384–399.  
499
- 500 Malécot, G. 1968. *The Mathematics of Heredity.* Translated from the French edition (Paris,  
501 1948). Ed. Yermanos, D.M. Freeman, San Francisco, 1969.  
502
- 503 Maruyama, T. 1970a. Effective number of alleles in a subdivided population. *Theo. Pop. Bio.* 1:  
504 273–306.  
505
- 506 Maruyama, T. 1970b. The rate of decrease of heterozygosity in a population occupying a circular  
507 or linear habitat. *Genetics.* 67: 437–454.  
508

- 509 Maruyama, T. 1971. Analysis of population structure: II. Two-dimensional stepping stone  
510 models of finite length and other geographically structured populations. *Ann. Hum. Gen., Lon.*  
511 35: 179–196.
- 512
- 513 Meirmans, P.G. 2012. The trouble with isolation by distance. *Mol. Eco.* 21(12): 2839–2846.  
514
- 515 Miller, M.A., Pfeiffer, W., and T. Schwartz. 2010. Creating the CIPRES Science Gateway for  
516 inference of large phylogenetic trees. *Proceedings of the Gateway Computing Environments*  
517 *Workshop (GCE)*. New Orleans, LA.
- 518
- 519 Nei, M., and W.H. Li. 1979. Mathematical model for studying genetic variation in terms of  
520 restriction endonucleases. *PNAS.* 76(10): 5269–5273.
- 521
- 522 Peterson, M.A., and R.F. Denno. 1998. The influence of dispersal and diet breadth on patterns of  
523 genetic isolation by distance in phytophagous insects. *Am. Nat.* 152(3): 428–446.  
524
- 525 Pond, S.K., and S.V. Muse. 2005. Site-to-site variation of synonymous substitution rates. *Mol.*  
526 *Biol. Evo.* 22(12): 2375–2385.
- 527
- 528 R Core Team (2019). R: A language and environment for statistical computing. R Foundation for  
529 Statistical Computing, Vienna, Austria. URL: <https://www.R-project.org/>.
- 530
- 531 Rieman, B.E., and F. W. Allendorf. 2011. Effective Population Size and Genetic Conservation  
532 Criteria for Bull Trout. *North American Journal of Fisheries Management.* 21(4): 756–764.  
533
- 534 Rosenberg, N.A., and M.W. Feldman. 2002. The relationship between coalescent times and  
535 population divergence times. In: *Modern Developments in Theoretical Population Genetics*. Eds.  
536 Slatkin, M. and M. Veuille. Oxford Univ. Pres. New York, NY.
- 537
- 538 Slatkin, M. 1991. Inbreeding coefficients and coalescence times. *Genet. Res., Camb.* 58: 167–  
539 175.
- 540
- 541 Slatkin, M. 2004. Seeing ghosts: the effect of unsampled populations on migration rates  
542 estimated for sampled populations. *Mol. Eco.* 14(1): 67–73.
- 543
- 544 Stange, M., Sánchez-Villagra, M.R., Salzburger, W., and M. Matschiner. 2018. Bayesian  
545 divergence-time estimation with genome-wide single-nucleotide polymorphism data of sea  
546 catfish (Ariidae) supports Miocene closure of the Panamanian Isthmus. *Sys. Bio.* 67(4): 681–  
547 699.
- 548
- 549 Turner, T.F., Wares, J.P., and J.R. Gold. 2002. Genetic Effective Size Is Three Orders of  
550 Magnitude Smaller Than Adult Census Size in an Abundant, Estuarine-Dependent Marine Fish  
551 (*Sciaenops ocellatus*). *Genetics.* 162(3): 1329–1339.
- 552
- 553 Wakeley, J. 1998. Segregating sites in Wright’s island model. *Theoret. Pop. Biol.* 53:166–175.  
554



- 555 Wakeley, J. 1999. Non-equilibrium migration in human history. *Genetics*. 153:1863–1871.  
556
- 557 Wakeley, J. 2000. The effects of subdivision on the genetic divergence of populations and  
558 species. *Evolution*. 54(4): 1092–1101.  
559
- 560 Weir, J.T., and D. Schluter. 2008. Calibrating the avian molecular clock. *Mol. Eco.* 17: 2321–  
561 2328.  
562
- 563 Wilkins, J.F., and J. Wakeley. 2002. The coalescent in a continuous, finite, linear population.  
564 *Genetics*. 161: 873–888.  
565
- 566 Wright, S. 1931. Evolution in Mendelian populations. *Genetics*. 16(2): 97–159.  
567
- 568 Wright, S. 1943. Isolation by distance. *Genetics*. 28:114–138.  
569
- 570 Yu, G., Smith, D.K., Zhu, H., Guan, Y., and T.T.Y. Lam. 2017. ggtree: an R package for  
571 visualization and annotation of phylogenetic trees with their covariates and other associated data.  
572 *Meth. Eco. Evo.* 8(1): 28–36.

573 **Supplementary Material**

574

575

576 **Table S1.** Pairwise Wilcoxon test results for comparisons of  $T_D / ND$  of 10, 5, 2, 1, 0.5, and 0.1.

577 Significant ( $p < 0.05$ ) results are bolded.

578

| Comparison    | Ratio | Migration rate | p-value           |
|---------------|-------|----------------|-------------------|
| Ends-Center   | 10    | 0.1            | <b>&lt;2E-16</b>  |
| Island-Center | 10    | 0.1            | 0.26              |
| Island-Ends   | 10    | 0.1            | <b>&lt;2E-16</b>  |
| Ends-Center   | 10    | 0.01           | <b>&lt;2E-16</b>  |
| Island-Center | 10    | 0.01           | <b>0.019</b>      |
| Island-Ends   | 10    | 0.01           | <b>&lt;2E-16</b>  |
| Ends-Center   | 10    | 0.001          | <b>&lt;2E-16</b>  |
| Island-Center | 10    | 0.001          | <b>0.00000012</b> |
| Island-Ends   | 10    | 0.001          | <b>&lt;2E-16</b>  |
| Ends-Center   | 5     | 0.1            | <b>&lt;2E-16</b>  |
| Island-Center | 5     | 0.1            | 0.22              |
| Island-Ends   | 5     | 0.1            | <b>&lt;2E-16</b>  |
| Ends-Center   | 5     | 0.01           | <b>&lt;2E-16</b>  |
| Island-Center | 5     | 0.01           | 0.18              |

|               |   |       |                  |
|---------------|---|-------|------------------|
| Island-Ends   | 5 | 0.01  | <b>&lt;2E-16</b> |
| Ends-Center   | 5 | 0.001 | <b>&lt;2E-16</b> |
| Island-Center | 5 | 0.001 | <b>1.2E-08</b>   |
| Island-Ends   | 5 | 0.001 | <b>&lt;2E-16</b> |
| Ends-Center   | 2 | 0.1   | <b>2.1E-11</b>   |
| Island-Center | 2 | 0.1   | 0.46             |
| Island-Ends   | 2 | 0.1   | <b>1.2E-10</b>   |
| Ends-Center   | 2 | 0.01  | <b>&lt;2E-16</b> |
| Island-Center | 2 | 0.01  | <b>0.029</b>     |
| Island-Ends   | 2 | 0.01  | <b>&lt;2E-16</b> |
| Ends-Center   | 2 | 0.001 | <b>&lt;2E-16</b> |
| Island-Center | 2 | 0.001 | <b>0.000041</b>  |
| Island-Ends   | 2 | 0.001 | <b>&lt;2E-16</b> |
| Ends-Center   | 1 | 0.1   | <b>0.0000038</b> |
| Island-Center | 1 | 0.1   | 0.33893          |
| Island-Ends   | 1 | 0.1   | <b>0.00017</b>   |
| Ends-Center   | 1 | 0.01  | <b>&lt;2E-16</b> |
| Island-Center | 1 | 0.01  | 0.53             |

|               |     |       |                  |
|---------------|-----|-------|------------------|
| Island-Ends   | 1   | 0.01  | <b>&lt;2E-16</b> |
| Ends-Center   | 1   | 0.001 | <b>&lt;2E-16</b> |
| Island-Center | 1   | 0.001 | <b>0.0000023</b> |
| Island-Ends   | 1   | 0.001 | <b>&lt;2E-16</b> |
| Ends-Center   | 0.5 | 0.1   | <b>0.027</b>     |
| Island-Center | 0.5 | 0.1   | 0.759            |
| Island-Ends   | 0.5 | 0.1   | <b>0.013</b>     |
| Ends-Center   | 0.5 | 0.01  | <b>&lt;2E-16</b> |
| Island-Center | 0.5 | 0.01  | <b>0.032</b>     |
| Island-Ends   | 0.5 | 0.01  | <b>&lt;2E-16</b> |
| Ends-Center   | 0.5 | 0.001 | <b>&lt;2E-16</b> |
| Island-Center | 0.5 | 0.001 | 0.25             |
| Island-Ends   | 0.5 | 0.001 | <b>&lt;2E-16</b> |
| Ends-Center   | 0.1 | 0.1   | 1                |
| Island-Center | 0.1 | 0.1   | 1                |
| Island-Ends   | 0.1 | 0.1   | 1                |
| Ends-Center   | 0.1 | 0.01  | <b>0.0000068</b> |
| Island-Center | 0.1 | 0.01  | 0.91             |

|               |     |       |                  |
|---------------|-----|-------|------------------|
| Island-Ends   | 0.1 | 0.01  | <b>0.0000068</b> |
| Ends-Center   | 0.1 | 0.001 | <b>&lt;2E-16</b> |
| Island-Center | 0.1 | 0.001 | 0.077            |
| Island-Ends   | 0.1 | 0.001 | <b>&lt;2E-16</b> |

579  
580  
581  
582  
583

**Table S2.** Wilcoxon pairwise test comparing  $(T_{MRCA} - T_D) / T_D$  of center and end demes for different rates of migration and ratios of  $T_D / ND$ . Bolded  $p$ -values indicate  $p < 0.05$ .

| Ratio | Migration rate | p-value         |
|-------|----------------|-----------------|
| 50    | 0.1            | 0.385           |
| 50    | 0.01           | <b>0.000748</b> |
| 50    | 0.001          | <b>2.00E-16</b> |
| 25    | 0.1            | <b>0.00282</b>  |
| 25    | 0.01           | <b>3.55E-09</b> |
| 25    | 0.001          | <b>2.00E-16</b> |
| 10    | 0.1            | <b>0.0118</b>   |
| 10    | 0.01           | <b>1.24E-08</b> |
| 10    | 0.001          | <b>2.00E-16</b> |
| 5     | 0.1            | 0.744           |
| 5     | 0.01           | 0.0528          |
| 5     | 0.001          | <b>2.00E-16</b> |
| 1     | 0.1            | 0.0672          |
| 1     | 0.01           | <b>2.00E-16</b> |
| 1     | 0.001          | <b>2.00E-16</b> |

584  
585

**Table S3.** Table of estimated divergence-times in SNAPP.

| $T_D / ND$ | Deme sampled | Migration rate | True Age ( $T_D$ ) | Expected Estimate ( $eT_D$ ) | Actual Estimate ( $T_{MRCA}$ ) | $T_{MRCA} - eT_D$ | $(T_{MRCA} - eT_D) / eT_D$ |
|------------|--------------|----------------|--------------------|------------------------------|--------------------------------|-------------------|----------------------------|
| 50         | End          | 0.1            | 50000              | 52000                        | 32929                          | -19071            | -0.36675                   |

|    |        |       |       |       |       |        |              |
|----|--------|-------|-------|-------|-------|--------|--------------|
| 50 | End    | 0.01  | 50000 | 52000 | 36330 | -15670 | -0.301346154 |
| 50 | End    | 0.001 | 50000 | 52000 | 40028 | -11972 | -0.230230769 |
| 50 | Center | 0.1   | 50000 | 52000 | 46270 | -5730  | -0.110192308 |
| 50 | Center | 0.01  | 50000 | 52000 | 54301 | 2301   | 0.04425      |
| 50 | Center | 0.001 | 50000 | 52000 | 49004 | -2996  | -0.057615385 |
| 25 | End    | 0.1   | 25000 | 27000 | 25893 | -1107  | -0.041       |
| 25 | End    | 0.01  | 25000 | 27000 | 26492 | -508   | -0.018814815 |
| 25 | End    | 0.001 | 25000 | 27000 | 48430 | 21430  | 0.793703704  |
| 25 | Center | 0.1   | 25000 | 27000 | 22264 | -4736  | -0.175407407 |
| 25 | Center | 0.01  | 25000 | 27000 | 25488 | -1512  | -0.056       |
| 25 | Center | 0.001 | 25000 | 27000 | 26147 | -853   | -0.031592593 |
| 10 | End    | 0.1   | 10000 | 12000 | 12439 | 439    | 0.036583333  |
| 10 | End    | 0.01  | 10000 | 12000 | 14085 | 2085   | 0.17375      |
| 10 | End    | 0.001 | 10000 | 12000 | 28629 | 16629  | 1.38575      |
| 10 | Center | 0.1   | 10000 | 12000 | 13234 | 1234   | 0.102833333  |
| 10 | Center | 0.01  | 10000 | 12000 | 13040 | 1040   | 0.086666667  |
| 10 | Center | 0.001 | 10000 | 12000 | 21782 | 9782   | 0.815166667  |
| 5  | End    | 0.1   | 5000  | 7000  | 10618 | 3618   | 0.516857143  |

|   |        |       |      |      |        |         |              |
|---|--------|-------|------|------|--------|---------|--------------|
| 5 | End    | 0.01  | 5000 | 7000 | 12730  | 5730    | 0.818571429  |
| 5 | End    | 0.001 | 5000 | 7000 | 19936  | 12936   | 1.848        |
| 5 | Center | 0.1   | 5000 | 7000 | 11144  | 4144    | 0.592        |
| 5 | Center | 0.01  | 5000 | 7000 | 10595  | 3595    | 0.513571429  |
| 5 | Center | 0.001 | 5000 | 7000 | 11697  | 4697    | 0.671        |
| 1 | End    | 0.1   | 1000 | 3000 | 1512.9 | -1487.1 | -0.4957      |
| 1 | End    | 0.01  | 1000 | 3000 | 2700   | -300    | -0.1         |
| 1 | End    | 0.001 | 1000 | 3000 | 23845  | 20845   | 6.948333333  |
| 1 | Center | 0.1   | 1000 | 3000 | 1513.2 | -1486.8 | -0.4956      |
| 1 | Center | 0.01  | 1000 | 3000 | 2649.1 | -350.9  | -0.116966667 |
| 1 | Center | 0.001 | 1000 | 3000 | 1647.2 | -1352.8 | -0.450933333 |

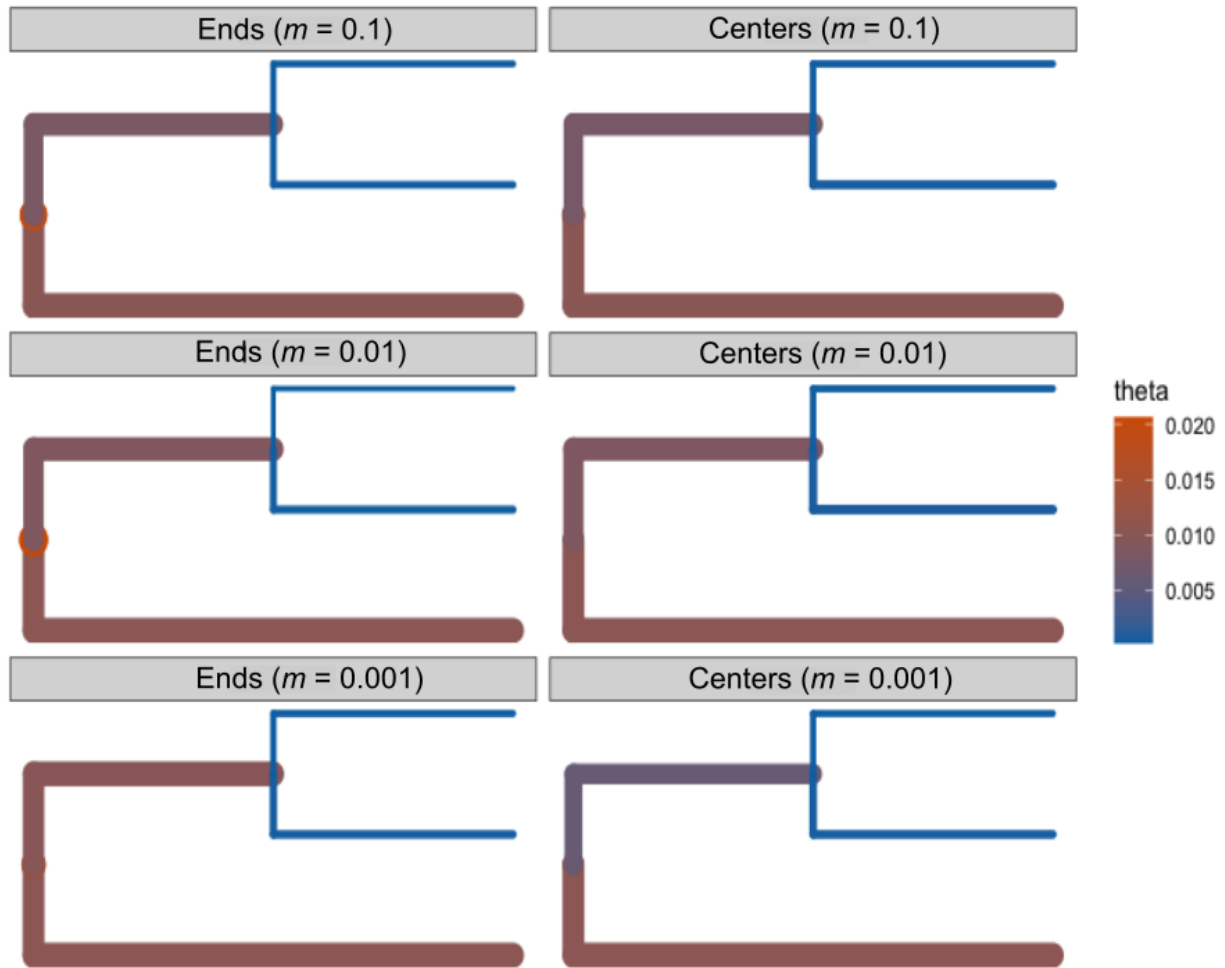

588

589

590 **Figure S1.** Estimates of  $\theta$  in SNAPP for  $T_D / ND = 50$ . Branch widths are proportional to the  
591 estimated  $\theta$ .

592



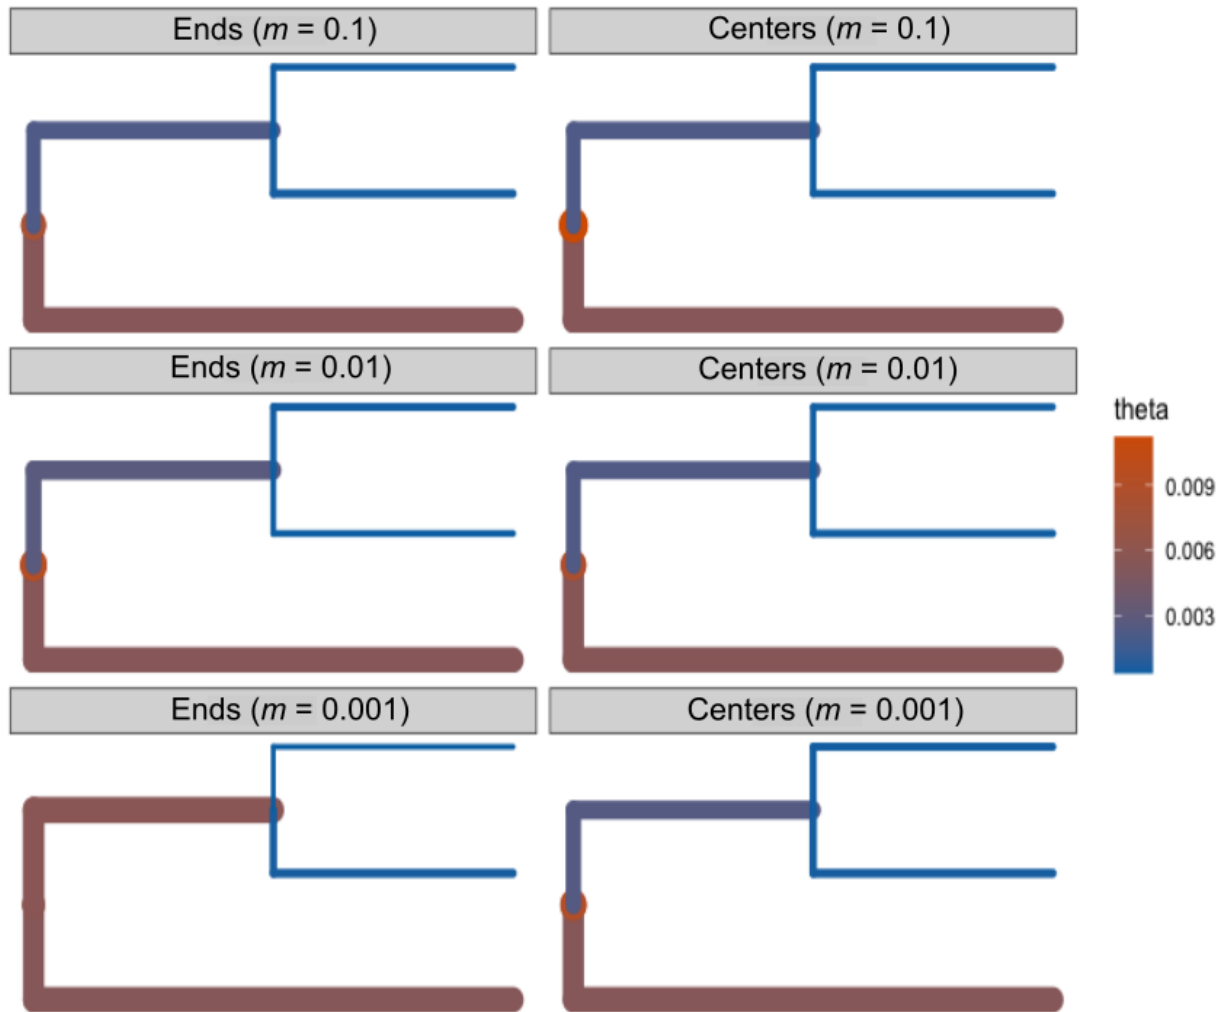

593

594

595

596

597

**Figure S2.** Estimates of  $\theta$  in SNAPP for  $T_D / ND = 25$ . Branch widths are proportional to the estimated  $\theta$ .

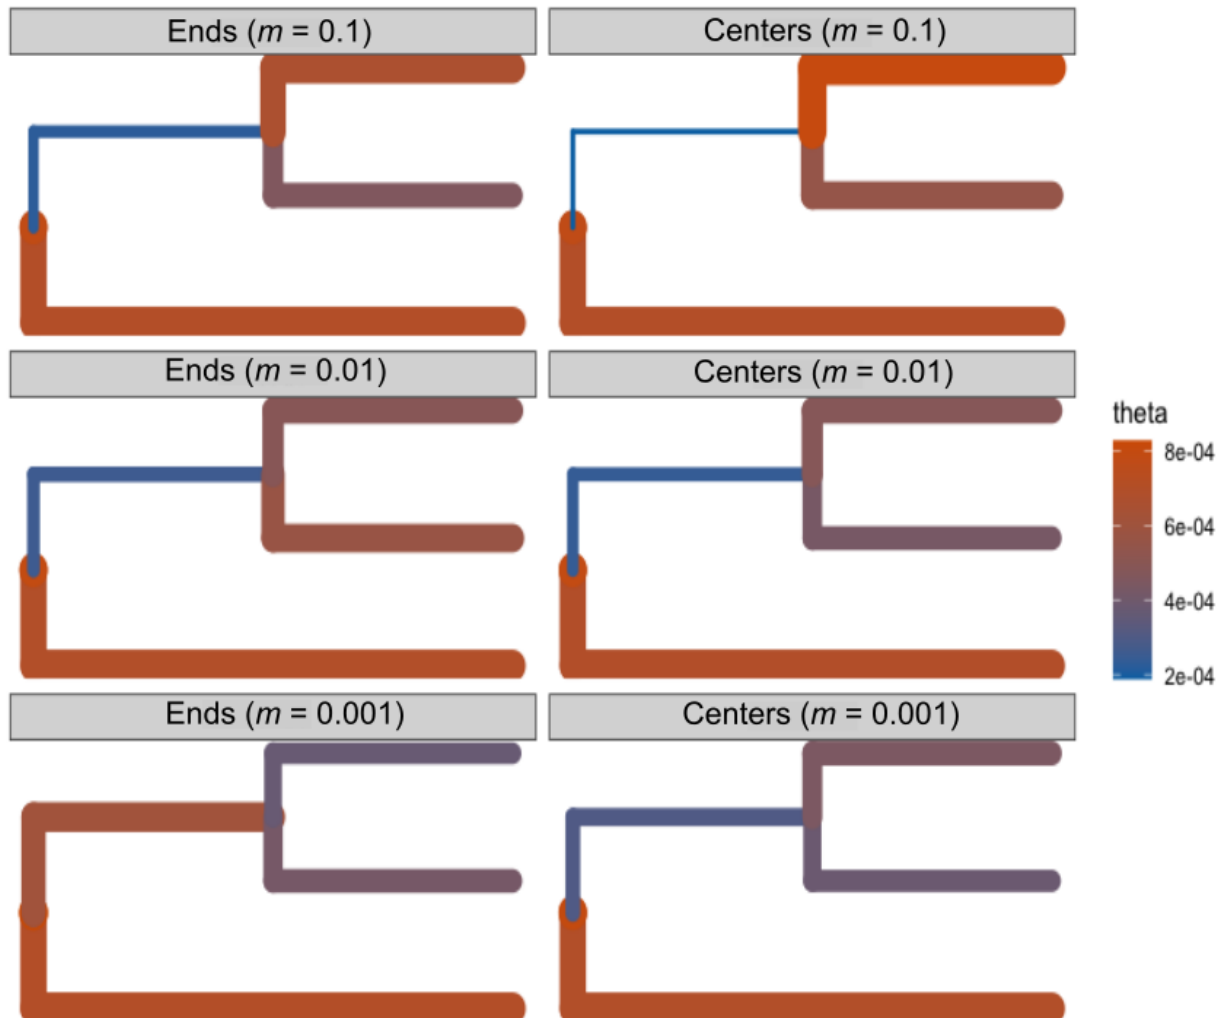

598

599

600 **Figure S3.** Estimates of  $\theta$  in SNAPP for  $T_D / ND = 5$ . Branch widths are proportional to the

601 estimated  $\theta$ .

602

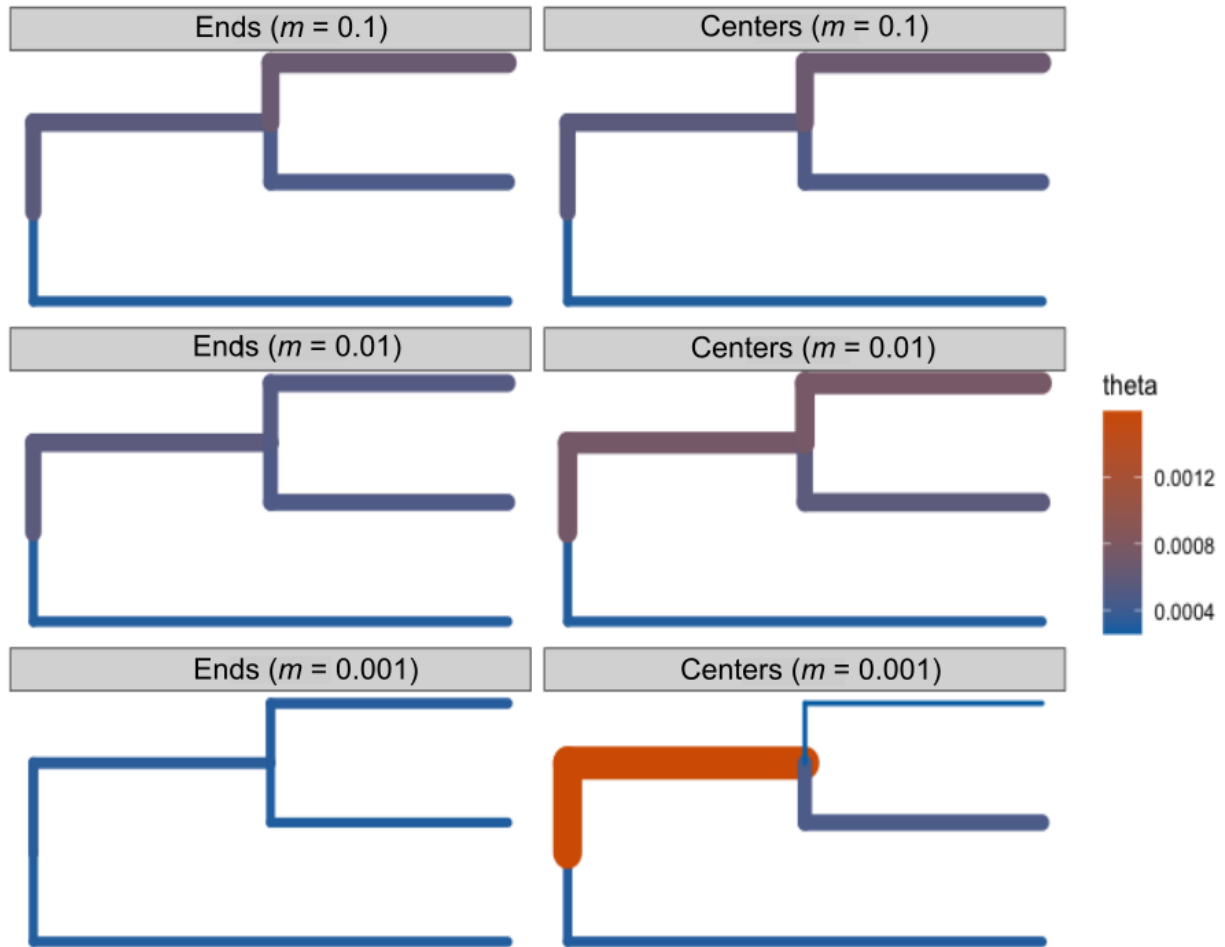

603

604

605 **Figure S4.** Estimates of  $\theta$  in SNAPP for  $T_D / ND = 1$ . Branch widths are proportional to the  
606 estimated  $\theta$ .

607

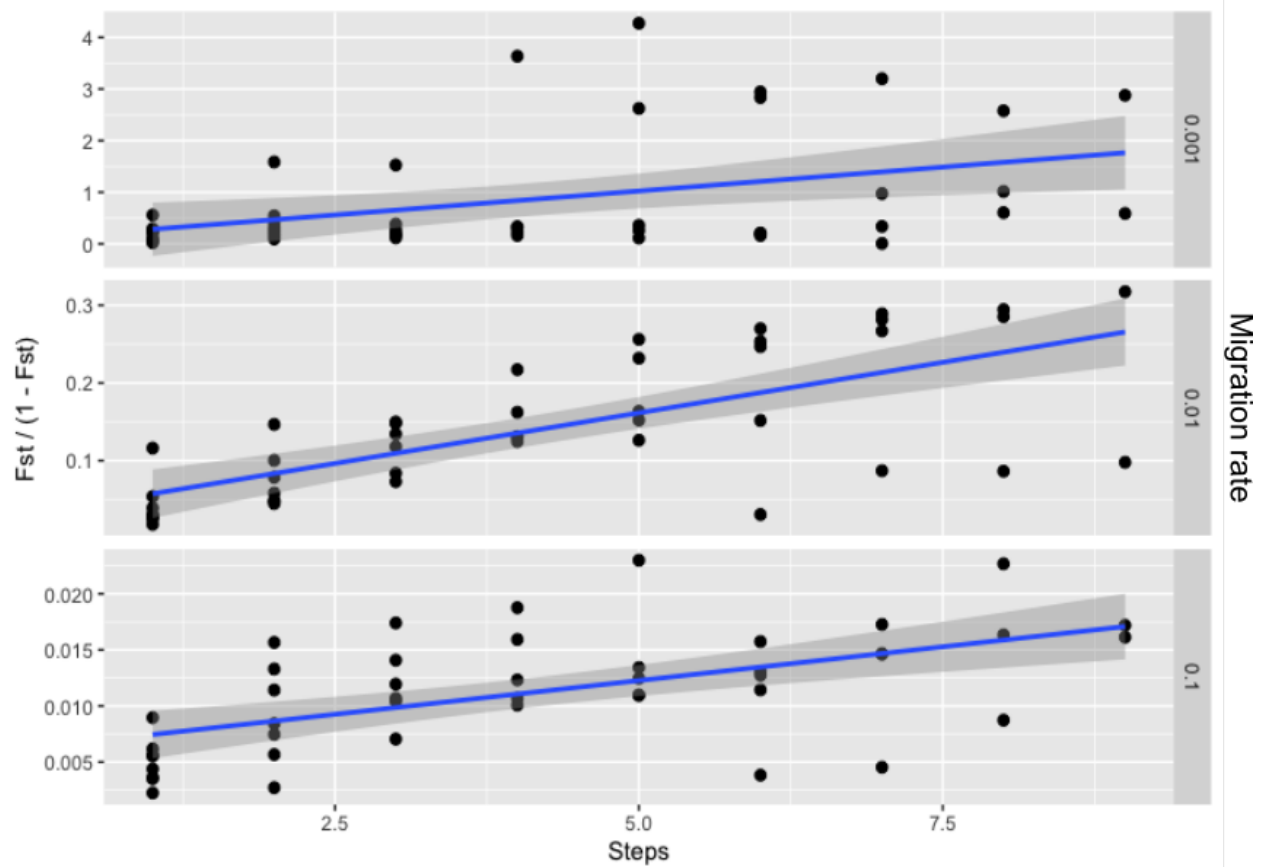

608

609 **Figure S5.** Isolation-by-distance plots for three migration rates in the ancestral population.

610 Pairwise  $F_{ST}$  was calculated between each deme in the ancestral population prior to the split to

611 verify that a pattern of IBD had occurred. “Steps” are the distance from deme  $i$  to deme  $j$ , where

612 neighboring demes are 1 step apart. Note that the y-axis differs between panels. All slopes were

613 significant ( $p < 0.05$ ).
